# Supplementary material for: Optimizing diastolic pressure gradient assessment
Source: Springer Nature journal article supplement (doi:10.1007/s00392-020-01641-w), 2020-05-11
Supplement: MOESM1 [file 17970840]

**SCREENED**  
n=220

All consecutive patients referred for RHC for HF assessment  
(2014.02. – 2017.06.)  
**n=220**

Heart Transplanted; n=11  
ARVC; n=3

a priori  
excluded

Pre-capillary PH; n=15  
Constrictive pericarditis; n=14

excluded  
by RHC

Significant valve disease; n=10  
Image quality; n=3

excluded  
by echo

**EXCLUDED**  
n=56

**ENROLLED**  
n=164

Excluded because of inadequate  
Pressure tracing quality;  
n=11

**FINAL ANALYSIS**  
n=153
