# Supplementary material for: Optimizing diastolic pressure gradient assessment
Source: Springer Nature journal article supplement (doi:10.1007/s00392-020-01641-w), 2020-05-11
Supplement: MOESM2 [file 17970840]

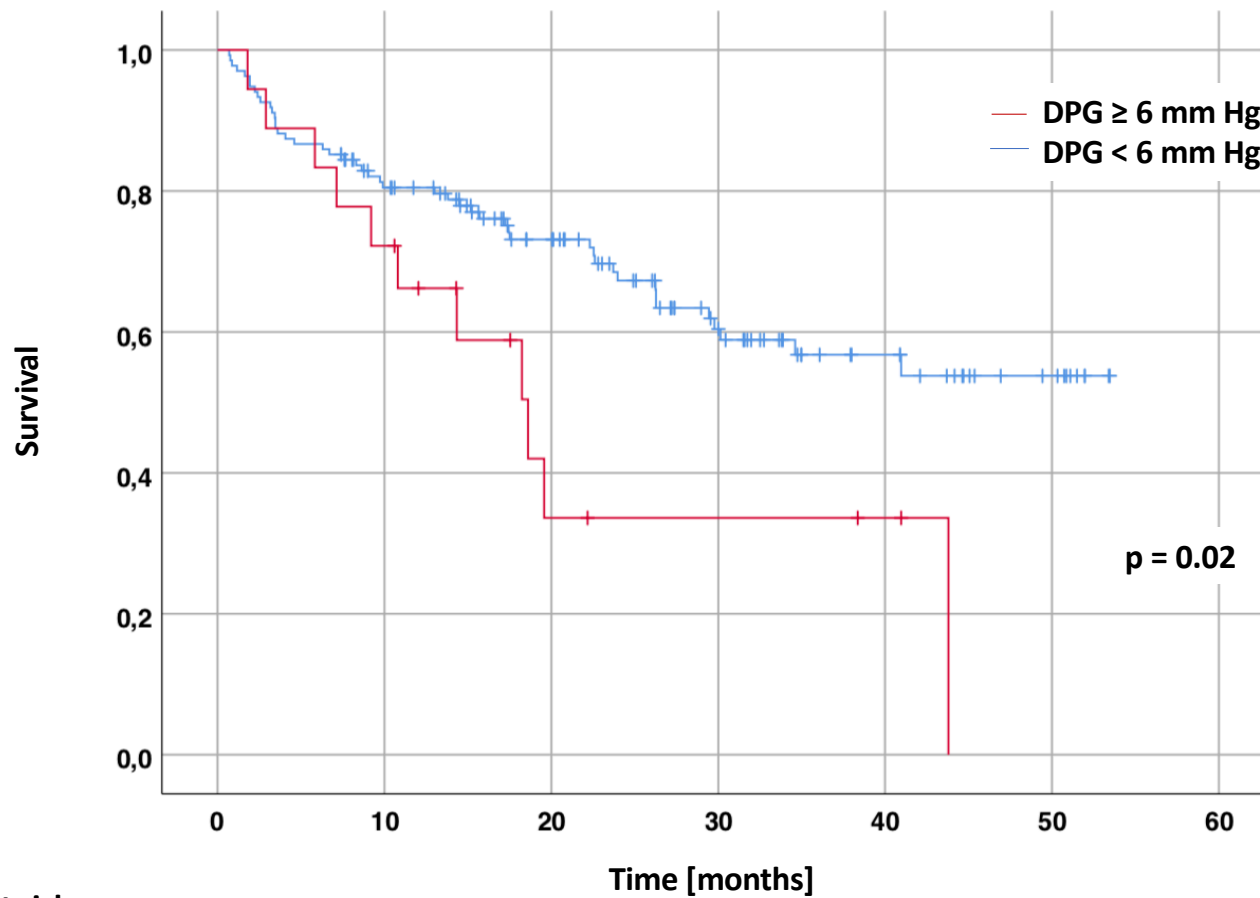

**Number at risk**

|               |     |     |    |    |    |   |   |
|---------------|-----|-----|----|----|----|---|---|
| DPG ≥ 6 mm Hg | 18  | 13  | 4  | 3  | 2  | 0 | 0 |
| DPG < 6 mm Hg | 135 | 101 | 71 | 40 | 21 | 9 | 0 |
